# Supplementary material for: Resveratrol-Induced AMP-Activated Protein Kinase Activation Is Cell-Type Dependent: Lessons from Basic Research for Clinical Application
Source: PubMed Central journal article supplement (PMC5537865; doi:10.3390/nu9070751), 2017-07-14
Supplement: nutrients-09-00751-s001.pdf [file nutrients-09-00751-s001.pdf]

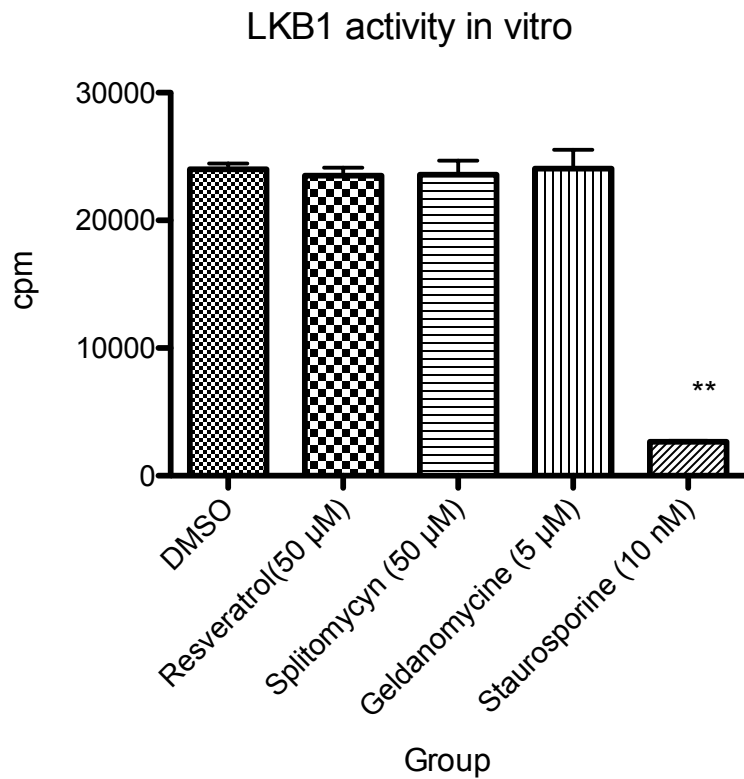

**pT336-LKB1**

Flag-MO25

His-STRAD

**GST-LKB1**

**Transfection**

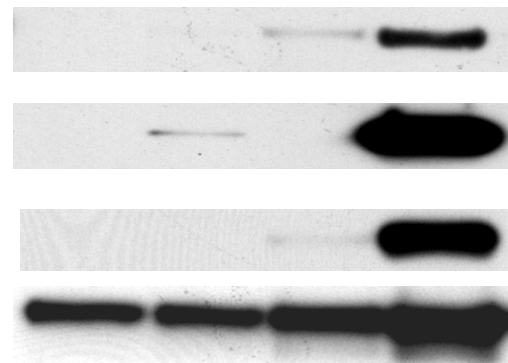

**+B-Gal**

**+MO25**

**+STRAD**

**+STRAD**

**+MO25**

GST-LKB1 wt.
